# Supplementary material for: Nutritional Profile of Commercialized Plant-Based Meat: An Integrative Review with a Systematic Approach
Source: MDPI journal article supplement (doi:10.3390/foods12030448), 2023-01-18
Supplement: s1 [file s1]

**Table S1** – Full data regarding the information collected in the included studies

| AUTHOR           | YE<br>R | COUNT<br>RY | TITLE                                                                                                            | INGREDIEN<br>TS AND<br>NUTRIENT<br>S? | FOOD<br>LABELS<br>OR<br>CHEMIC<br>AL<br>ANALYSI<br>S | TYPE OF<br>PRODUCTS                                                | SAMPLE<br>SIZE | MAIN<br>INGREDIEN<br>TS | MAIN<br>FAT<br>SOURCE<br>S | MAIN<br>PROTEIN<br>SOURCES                                                                                                                                                                                                                                                     | MAIN FOOD<br>ADDITIVES |
|------------------|---------|-------------|------------------------------------------------------------------------------------------------------------------|---------------------------------------|------------------------------------------------------|--------------------------------------------------------------------|----------------|-------------------------|----------------------------|--------------------------------------------------------------------------------------------------------------------------------------------------------------------------------------------------------------------------------------------------------------------------------|------------------------|
| Svarc et<br>al., | 2021    | Denmark     | Nutrient<br>content in<br>plant-based<br>protein<br>products<br>intended for<br>food<br>composition<br>databases | Nutrients                             | Chemical<br>Analysis                                 | Minced; Pieces;<br>Sausages; Minced<br>Balls, Cold Cuts,<br>Seitan | 58             | N/A                     | N/A                        | Minced:<br>(Mycoprote<br>in, Pea<br>Protein,<br>Soy<br>Protein);<br>Pieces<br>(Mycoprote<br>in, Soy<br>Protein);<br>Sausages<br>(Pea<br>Protein,<br>Soy<br>Protein);<br>Cold Cuts<br>(Soy<br>Protein,<br>Pea<br>Protein,<br>Wheat<br>Protein);<br>Seitan<br>(Wheat<br>Protein) | N/A                    |

---

|                  |      |        |                                                                                     |                           |             |                                                 |    |                                                                                                                                                                                            |     |                        |                                                                                                                                                                                                                     |
|------------------|------|--------|-------------------------------------------------------------------------------------|---------------------------|-------------|-------------------------------------------------|----|--------------------------------------------------------------------------------------------------------------------------------------------------------------------------------------------|-----|------------------------|---------------------------------------------------------------------------------------------------------------------------------------------------------------------------------------------------------------------|
| Mariseva et al., | 2020 | Latvia | ASSESSMENT OF INGREDIENTS AND NUTRITIONAL VALUE OF VEGAN PRODUCTS IN LATVIAN MARKET | Ingredients and Nutrients | Food Labels | Beverages, Dairy Alternatives, Meat Substitutes | 80 | Beverages: Soya, Starch (Potato and Corn) and Oats; Dairy Alternatives: Soya, Wheat and Starch (Potato and Corn); Meat Substitutes: Soya, Wheat, Starch (Potato and Corn), Pulses and Oats | N/A | Soya, Wheat and Pulses | Gellan gum, locust bean gum, guar gum, carrageenans, xanthan gum, methylcellulose, mono and diglycerides of fatty acids, mono and di acetyl tartaric acid, esters of mono and diglycerids, calcium stearoyl lactate |
|------------------|------|--------|-------------------------------------------------------------------------------------|---------------------------|-------------|-------------------------------------------------|----|--------------------------------------------------------------------------------------------------------------------------------------------------------------------------------------------|-----|------------------------|---------------------------------------------------------------------------------------------------------------------------------------------------------------------------------------------------------------------|

---

|                |      |        |                                                                                                                                 |                           |             |                                                                                                                                     |     |                                                                                                                         |                         |                                                    |                                                    |
|----------------|------|--------|---------------------------------------------------------------------------------------------------------------------------------|---------------------------|-------------|-------------------------------------------------------------------------------------------------------------------------------------|-----|-------------------------------------------------------------------------------------------------------------------------|-------------------------|----------------------------------------------------|----------------------------------------------------|
| Boukid et al., | 2022 | Spain  | Seafood alternatives: assessing the nutritional profile of products sold in the global market                                   | Nutrients                 | Food Labels | Tuna. Shrimps, Calamari, Fish fingers, Fish Sticks, Salmon, Caviar and Fillet                                                       | 149 | N/A                                                                                                                     | N/A                     | N/A                                                | N/A                                                |
| Romão et al.,  | 2022 | Brazil | Are Vegan Alternatives to Meat Products Healthy? A Study on Nutrients and Main Ingredients of Products Commercialized in Brazil | Ingredients and Nutrients | Food labels | Hamburgers; Minced Beef; Meatballs; Breaded Chicken; Chicken Hamburgers; Chicken Breast; Canned fish; Fish Cakes; Sausages and Hams | 125 | Ingredients derived from legumes (soy, peas, chickpeas, and beans) and gluten were the most used in the studied samples | Unspecified vegetal fat | Soy Protein, Gluten, Pea Protein, Chickpeas, Beans | Methylcellulose, Xanthan Gum, Guar Gum, Flavouring |

---

|                 |      |     |                                                                                                                    |           |             |             |    |     |     |     |     |
|-----------------|------|-----|--------------------------------------------------------------------------------------------------------------------|-----------|-------------|-------------|----|-----|-----|-----|-----|
| Harnack et al., | 2021 | USA | Nutrient Composition of a Selection of Plant-Based Ground Beef Alternative Products Available in the United States | Nutrients | Food Labels | Ground Beef | 37 | N/A | N/A | N/A | N/A |
|-----------------|------|-----|--------------------------------------------------------------------------------------------------------------------|-----------|-------------|-------------|----|-----|-----|-----|-----|

---

---

|                          |      |           |                                                                                                  |                           |             |                                                                                                                                                                                                                                                                   |     |                                                                                                                                                                                                     |                                                                                                                                                   |                                                                                                  |     |
|--------------------------|------|-----------|--------------------------------------------------------------------------------------------------|---------------------------|-------------|-------------------------------------------------------------------------------------------------------------------------------------------------------------------------------------------------------------------------------------------------------------------|-----|-----------------------------------------------------------------------------------------------------------------------------------------------------------------------------------------------------|---------------------------------------------------------------------------------------------------------------------------------------------------|--------------------------------------------------------------------------------------------------|-----|
| Curtain & Grafenaue<br>r | 2019 | Australia | Plant-based meat substitutes in the flexitarian age: An audit of products on supermarket shelves | Ingredients and Nutrients | Food labels | burgers, sausages, mince, chicken, seafood, and an additional 'other' category with products that fell outside of these categories (others: Meat-free products falling outside of other categories, including "Veggie Roast," "Bacon-Style Rashers," and "Polony) | 137 | More than two-thirds of all products (35%, n = 48) included legume ingredients, such as adzuki and black beans, chickpeas, and lentils, with products containing between 9%–65% legume ingredients. | Fat/Saturated Fat: Vegetable oil, canola oil, sunflower oil, sunflower kernels, rice bran oil, coconut oil, flax seed meal, cocoa butter, peanuts | protein: Soy protein, pea protein, soy beans, hydrolysed vegetable protein, mycoprotein, almonds | N/A |
|--------------------------|------|-----------|--------------------------------------------------------------------------------------------------|---------------------------|-------------|-------------------------------------------------------------------------------------------------------------------------------------------------------------------------------------------------------------------------------------------------------------------|-----|-----------------------------------------------------------------------------------------------------------------------------------------------------------------------------------------------------|---------------------------------------------------------------------------------------------------------------------------------------------------|--------------------------------------------------------------------------------------------------|-----|

---

|                      |      |        |                                                                            |                           |             |                                                                                                                                                   |     |                                                            |                        |             |                                                                                                                                                                                                       |
|----------------------|------|--------|----------------------------------------------------------------------------|---------------------------|-------------|---------------------------------------------------------------------------------------------------------------------------------------------------|-----|------------------------------------------------------------|------------------------|-------------|-------------------------------------------------------------------------------------------------------------------------------------------------------------------------------------------------------|
| D'Alessandro et al., | 2022 | Italy  | Processed Plant-Based Foods for CKD Patients: Good Choice, but Be Aware    | Ingredients and Nutrients | Food labels | Burgers, desserts and ice cream, cold cuts and sausages, cutlets and nuggets, meatballs, ready meat, plant-based drinks, cheeses, yogurts, sauces | 560 | Soy is the most used ingredient, followed by rice and oats | Seed oil               | N/A         | The most used (>50%) are those belonging to the class of stabilizers/thickeners, followed by emulsifiers and, finally, by antioxidants. All the other classes were used in smaller percentages (<7%). |
| Bryngelsson et al.,  | 2022 | Sweden | Nutritional assessment of plant-based meat analogues on the Swedish market | Ingredients and Nutrients | Food labels | Sausages, bites/fillets, burgers, mince, cold cuts, ball, schnitzel, nugget, bacon and others                                                     | 142 | Soy protein, pea protein, wheat, pulses                    | rapeseed and sunflower | Soy and pea | N/A                                                                                                                                                                                                   |

|                       |      |        |                                                                                                                                                        |           |              |                                                                                                |                                                                         |     |     |     |     |
|-----------------------|------|--------|--------------------------------------------------------------------------------------------------------------------------------------------------------|-----------|--------------|------------------------------------------------------------------------------------------------|-------------------------------------------------------------------------|-----|-----|-----|-----|
| Tonheim et al.,       | 2022 | Norway | Plant-based meat and dairy substitutes on the Norwegian market: comparing macronutrient content in substitutes with equivalent meat and dairy products | Nutrients | Foods labels | Plant-based meat and dairy substitutes                                                         | 102 meat substitute products and 173 milk and dairy substitute products | N/A | N/A | N/A | N/A |
| Alessandri ni et al., | 2021 | UK     | Nutritional Quality of Plant-Based Meat Products Available in the UK: A Cross-Sectional Survey                                                         | Nutrients | Foods labels | Plant-Based Meat Products (sausages, burgers, plain poultry, breaded poultry, mince, meatballs | 207 Plant-based meat and 226 meat products                              | N/A | N/A | N/A | N/A |

---

|                   |     |                                                                                                       |           |             |                          |                                                                             |     |     |     |     |
|-------------------|-----|-------------------------------------------------------------------------------------------------------|-----------|-------------|--------------------------|-----------------------------------------------------------------------------|-----|-----|-----|-----|
| Cole et al., 2021 | USA | Examination of the nutritional composition of alternative beef burgers available in the United States | Nutrients | Food labels | Alternative beef burgers | Imitation (n = 28), veggie (n = 89), and conventional beef (n = 41) burgers | N/A | N/A | N/A | N/A |
|-------------------|-----|-------------------------------------------------------------------------------------------------------|-----------|-------------|--------------------------|-----------------------------------------------------------------------------|-----|-----|-----|-----|

---

**Table S2**– Full data regarding the nutritional composition of the samples of the included studies

| Original Study       | Classification  | Main Protein Source  | Energy | Carbohydrates | Sugars | Protein | Dietary Fiber | Total Fat | Saturated Fat | Sodium | Iron | Zinc | Vitamin B12 |
|----------------------|-----------------|----------------------|--------|---------------|--------|---------|---------------|-----------|---------------|--------|------|------|-------------|
| Harnack et al.,      | Minced          | Various              | 153    | 12.7          | 0      | 12.6    | 1.9           | 6         | 1.3           | 265    | 10   | 0.7  | 0           |
| Curtain & Grafenauer | Chicken Cutlets | Various              | 198    | 12.6          | 2.1    | 13.4    | 4.7           | 9.4       | 1.6           | 508    | 4.8  | 0    | 0           |
| Curtain & Grafenauer | Burguers        | Various              | 175    | 16.7          | 3.4    | 9.6     | 5.3           | 7.2       | 1.5           | 372    | 3.6  | 0    | 0           |
| Curtain & Grafenauer | Sausages        | Various              | 175    | 11.4          | 2.2    | 13.4    | 4.2           | 7.9       | 2.4           | 497    | 3.4  | 0    | 0           |
| Curtain & Grafenauer | Others          | Various              | 185    | 13            | 3.2    | 14.5    | 4.9           | 7.9       | 1.6           | 568    | 3.2  | 0    | 0           |
| Curtain & Grafenauer | Minced          | Various              | 137    | 7.9           | 1.9    | 13.7    | 5.9           | 5.4       | 2.1           | 401    | 2.8  | 0    | 0           |
| Bryngelsson et al.,  | Sausages        | Soy and Pea Proteins | 208    | 4.7           | 1.5    | 13      | 4.2           | 15.4      | 0             | 490    | 2.75 | 0    | 1.25        |



|                      |                 |                      |        |       |      |       |      |       |      |        |       |   |      |
|----------------------|-----------------|----------------------|--------|-------|------|-------|------|-------|------|--------|-------|---|------|
| Bryngelsson et al.,  | Burguers        | Soy and Pea Proteins | 208    | 8     | 1.1  | 14    | 3.8  | 13    | 0    | 420    | 2.75  | 0 | 0    |
| Bryngelsson et al.,  | Minced          | Soy and Pea Proteins | 171    | 9.7   | 1.05 | 15.55 | 5    | 9.7   | 0    | 320    | 2.63  | 0 | 0    |
| Bryngelsson et al.,  | Meat Balls      | Soy and Pea Proteins | 196    | 11.35 | 1.1  | 13.6  | 4.2  | 11.35 | 0    | 440    | 2.1   | 0 | 0.38 |
| Bryngelsson et al.,  | Schnitzel       | Soy and Pea Proteins | 196    | 11    | 1.2  | 17    | 5.5  | 11    | 0    | 440    | 2.1   | 0 | 0.38 |
| Bryngelsson et al.,  | Chicken Nuggets | Soy and Pea Proteins | 217    | 10    | 1.1  | 16    | 5.3  | 10    | 0    | 420    | 2.1   | 0 | 0.38 |
| Cole et al.,         | Burguers        | Various              | 189.57 | 10.36 | 0.79 | 18.21 | 4.11 | 9.43  | 2.36 | 398.39 | 0.078 | 0 | 0    |
| Svarc et al.,        | Cold Cuts       | Mycoprotein          | 176    | 4.6   | 1.1  | 8     | 2.3  | 14.2  | 0    | 0      | 0     | 0 | 0    |
| Svarc et al.,        | Minced          | Mycoprotein          | 109    | 7.7   | 0.2  | 14    | 6.5  | 2.5   | 0    | 0      | 0     | 0 | 0    |
| Svarc et al.,        | Minced          | Pea Protein          | 230    | 9.5   | 1.9  | 16    | 5.6  | 14    | 0    | 0      | 0     | 0 | 0    |
| Svarc et al.,        | Sausages        | Pea Protein          | 212    | 7.2   | 1.6  | 16    | 5.1  | 13    | 0    | 0      | 0     | 0 | 0    |
| Svarc et al.,        | Minced          | Soy Protein          | 185    | 8.4   | 0.2  | 20    | 8.1  | 2.8   | 0    | 0      | 0     | 0 | 0    |
| Svarc et al.,        | Pieces          | Soy Protein          | 136    | 8.4   | 0.2  | 20    | 8.1  | 2.8   | 0    | 0      | 0     | 0 | 0    |
| Svarc et al.,        | Sausages        | Soy Protein          | 136    | 8.4   | 0.8  | 12    | 6.9  | 10    | 0    | 0      | 0     | 0 | 0    |
| Svarc et al.,        | Meat Balls      | Soy Protein          | 171    | 9.3   | 1.2  | 14.8  | 7.7  | 8.4   | 0    | 0      | 0     | 0 | 0    |
| Svarc et al.,        | Cold Cuts       | Soy and Pea Proteins | 158    | 7.1   | 2.7  | 7.5   | 2.8  | 11    | 0    | 0      | 0     | 0 | 0    |
| Svarc et al.,        | Cold Cuts       | Wheat Protein        | 231    | 17.5  | 5.9  | 3.1   | 5.5  | 4.6   | 0    | 0      | 0     | 0 | 0    |
| Svarc et al.,        | Pieces          | Wheat Protein        | 198    | 5.3   | 0.7  | 28    | 2.3  | 7.2   | 0    | 0      | 0     | 0 | 0    |
| Curtain & Grafenauer | Seafood         | Various              | 160    | 15.1  | 3.3  | 8.9   | 3.6  | 7.6   | 1.4  | 447    | 0     | 0 | 0    |
| D'Alessandro et al., | Burguers        | Various              | 178    | 11.9  | 1.8  | 12.3  | 4.3  | 8     | 1.3  | 400    | 0     | 0 | 0    |
| D'Alessandro et al., | Cold Cuts       | Various              | 142    | 4.1   | 0.9  | 14.8  | 2.1  | 7.4   | 1.1  | 420    | 0     | 0 | 0    |
| D'Alessandro et al., | Cutlets         | Various              | 196    | 15.7  | 0.9  | 10.1  | 3.5  | 9.4   | 1.2  | 420    | 0     | 0 | 0    |
| D'Alessandro et al., | Meat Balls      | Various              | 211    | 14.6  | 1.8  | 11.4  | 4.5  | 10.9  | 1.4  | 420    | 0     | 0 | 0    |

|                      |                 |                      |       |       |      |       |      |       |      |       |   |   |   |
|----------------------|-----------------|----------------------|-------|-------|------|-------|------|-------|------|-------|---|---|---|
| Bryngelsson et al.,  | Pieces          | Soy and Pea Proteins | 171   | 6.4   | 1.1  | 16.05 | 5    | 5.7   | 0    | 445   | 0 | 3 | 0 |
| Bryngelsson et al.,  | Cold Cuts       | Soy and Pea Proteins | 171   | 4.15  | 1.1  | 11    | 2.4  | 13.1  | 0    | 840   | 0 | 0 | 0 |
| Romão et al.,        | Burguers        | Various              | 216   | 18.22 | 0    | 14.77 | 5.6  | 8.91  | 3.2  | 434   | 0 | 0 | 0 |
| Romão et al.,        | Minced          | Various              | 192.8 | 12.91 | 0    | 14.25 | 5.77 | 10    | 3.01 | 572.9 | 0 | 0 | 0 |
| Romão et al.,        | Chicken Nuggets | Various              | 216.1 | 17.38 | 0    | 12.97 | 4.32 | 10.7  | 1.28 | 499.6 | 0 | 0 | 0 |
| Romão et al.,        | Chicken Cutlets | Various              | 201.9 | 10.07 | 0    | 18.25 | 6.08 | 9.29  | 5.04 | 372.3 | 0 | 0 | 0 |
| Romão et al.,        | Chicken Cutlets | Various              | 163.3 | 8.9   | 0    | 21.77 | 6.79 | 5.17  | 0.63 | 458.6 | 0 | 0 | 0 |
| Romão et al.,        | Seafood         | Various              | 194.2 | 14.7  | 0    | 8.75  | 6.41 | 11    | 2.63 | 416.0 | 0 | 0 | 0 |
| Romão et al.,        | Seafood         | Various              | 193.7 | 13.83 | 0    | 10.07 | 4.67 | 11.75 | 1.53 | 482.0 | 0 | 0 | 0 |
| Romão et al.,        | Sausages        | Various              | 189.6 | 8.63  | 0    | 14.2  | 4.71 | 9.85  | 1.73 | 572.3 | 0 | 0 | 0 |
| Romão et al.,        | Cold Cuts       | Various              | 251.9 | 14.57 | 0    | 19.64 | 4.71 | 9.85  | 1.73 | 572.3 | 0 | 0 | 0 |
| Mariseva et al.,     | Various         | Various              | 228   | 7.5   | 1.9  | 22.4  | 0    | 11.3  | 2.2  | 1200  | 0 | 0 | 0 |
| Boukid et al.,       | Seafood         | Various              | 208   | 3.6   | 0.5  | 14.9  | 0    | 10.4  | 1.8  | 320   | 0 | 0 | 0 |
| Boukid et al.,       | Seafood         | Various              | 96    | 10.6  | 1.5  | 1     | 0    | 3.7   | 0.01 | 136   | 0 | 0 | 0 |
| Boukid et al.,       | Seafood         | Various              | 202   | 11.88 | 0.99 | 1.09  | 0    | 4.26  | 0.64 | 196   | 0 | 0 | 0 |
| Boukid et al.,       | Seafood         | Various              | 233   | 20    | 0.89 | 11.33 | 0    | 11.2  | 1.1  | 420   | 0 | 0 | 0 |
| Boukid et al.,       | Seafood         | Various              | 243   | 25.35 | 1.4  | 10.63 | 0    | 11.43 | 1.1  | 556   | 0 | 0 | 0 |
| Boukid et al.,       | Seafood         | Various              | 144   | 8.6   | 0.6  | 2.77  | 0    | 7.07  | 0.93 | 480   | 0 | 0 | 0 |
| Boukid et al.,       | Seafood         | Various              | 13    | 1     | 0    | 1     | 0    | 0.5   | 0    | 1360  | 0 | 0 | 0 |
| Boukid et al.,       | Seafood         | Various              | 209   | 15.4  | 0.8  | 13.4  | 0    | 8.9   | 1.1  | 240   | 0 | 0 | 0 |
| Tonheim et al.,      | Various         | Various              | 201.5 | 8.4   | 1    | 13    | 3.6  | 10.2  | 1.1  | 600   | 0 | 0 | 0 |
| Alessandrini et al., | Sausages        | Various              | 175.4 | 0     | 0    | 12.10 | 5.40 | 8.90  | 2.60 | 560   | 0 | 0 | 0 |
| Alessandrini et al., | Burguers        | Various              | 203.1 | 0     | 0    | 11.10 | 4.60 | 10.30 | 1.70 | 440   | 0 | 0 | 0 |

|                      |                 |         |       |   |   |       |      |       |      |     |   |   |   |
|----------------------|-----------------|---------|-------|---|---|-------|------|-------|------|-----|---|---|---|
| Alessandrini et al., | Chicken Cutlets | Various | 161.5 | 0 | 0 | 18.70 | 5.60 | 5.70  | 0.80 | 520 | 0 | 0 | 0 |
| Alessandrini et al., | Chicken Nuggets | Various | 233.9 | 0 | 0 | 13.20 | 5.10 | 11.00 | 1.30 | 480 | 0 | 0 | 0 |
| Alessandrini et al., | Minced          | Various | 170.3 | 0 | 0 | 20.80 | 5.60 | 5.70  | 1.70 | 280 | 0 | 0 | 0 |
| Alessandrini et al., | Meat Balls      | Various | 178.9 | 0 | 0 | 13.90 | 5.50 | 8.70  | 1.10 | 440 | 0 | 0 | 0 |
